# Supplementary material for: Best practices for perturbation MPRA–a computational evaluation framework of sequence design strategies
Source: PubMed Central journal article supplement — bioRxiv. 2023 Sep 29:2023.09.27.559768. Preprint. [Version 1] doi: 10.1101/2023.09.27.559768 (PMC10557651; doi:10.1101/2023.09.27.559768), 2023-09-29
Supplement: NIHPP2023.09.27.559768v1-supplement-1.pdf [file NIHPP2023.09.27.559768v1-supplement-1.pdf]

SUPPLEMENTARY FIGURES AND TABLES

16 *Nucleic Acids Research*, YYYY, Vol. xx, No. xx

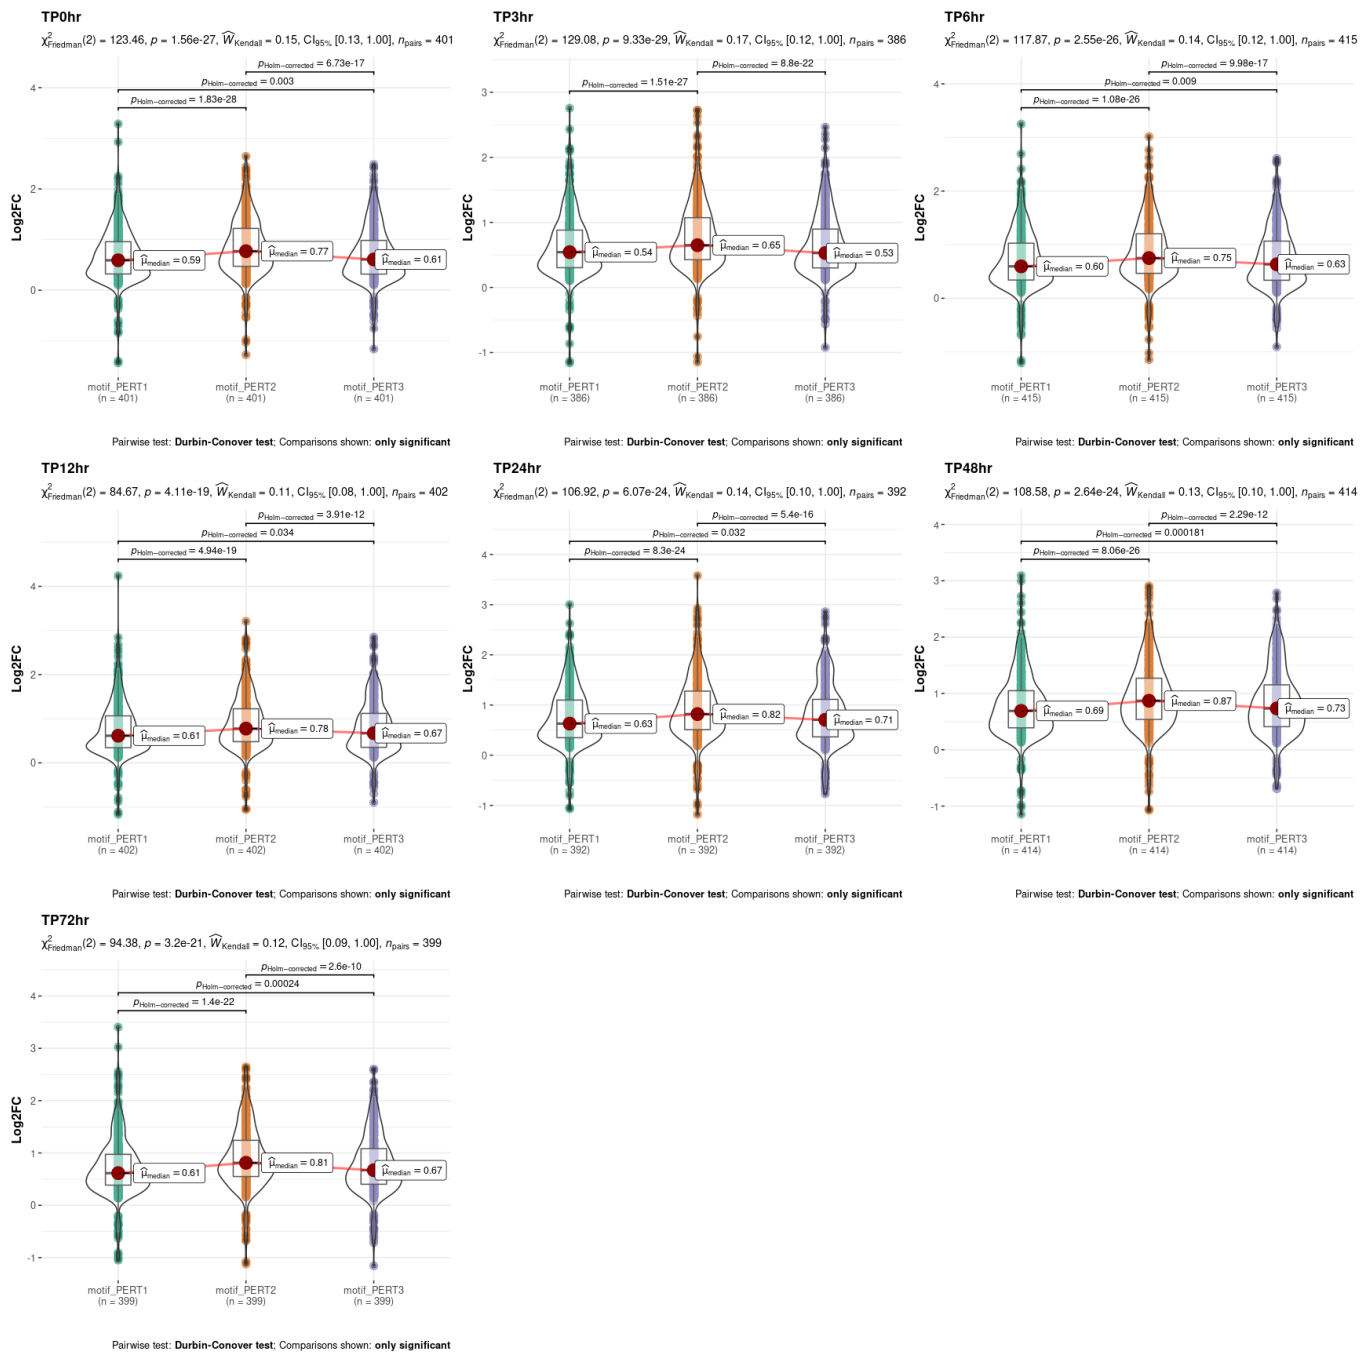

Figure Supplementary Figure 1. Comparison of Log<sub>2</sub>FC among three perturbation methods.

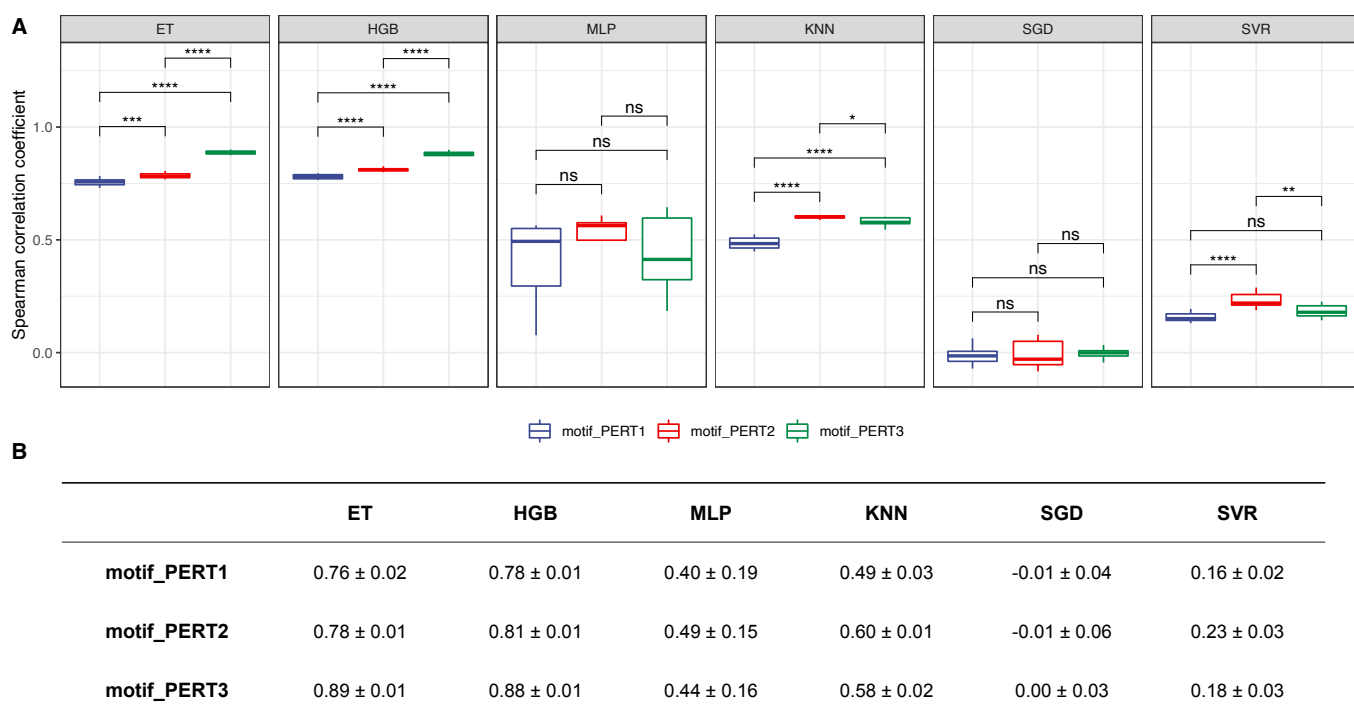

**Figure Supplementary Figure 2.** Performance of regression models. (A) The Spearman correlation coefficients of different regression models. Asterisks/ns indicate levels of statistical significance, calculated by pairwise Wilcoxon rank sum tests (P-value < 0.05 \*, < 0.01 \*\*, < 0.001 \*\*\*, < 0.0001 \*\*\*\*; ns, non significant). (B) A summary of the mean ± standard deviation values for Spearman correlation coefficients of regression models.

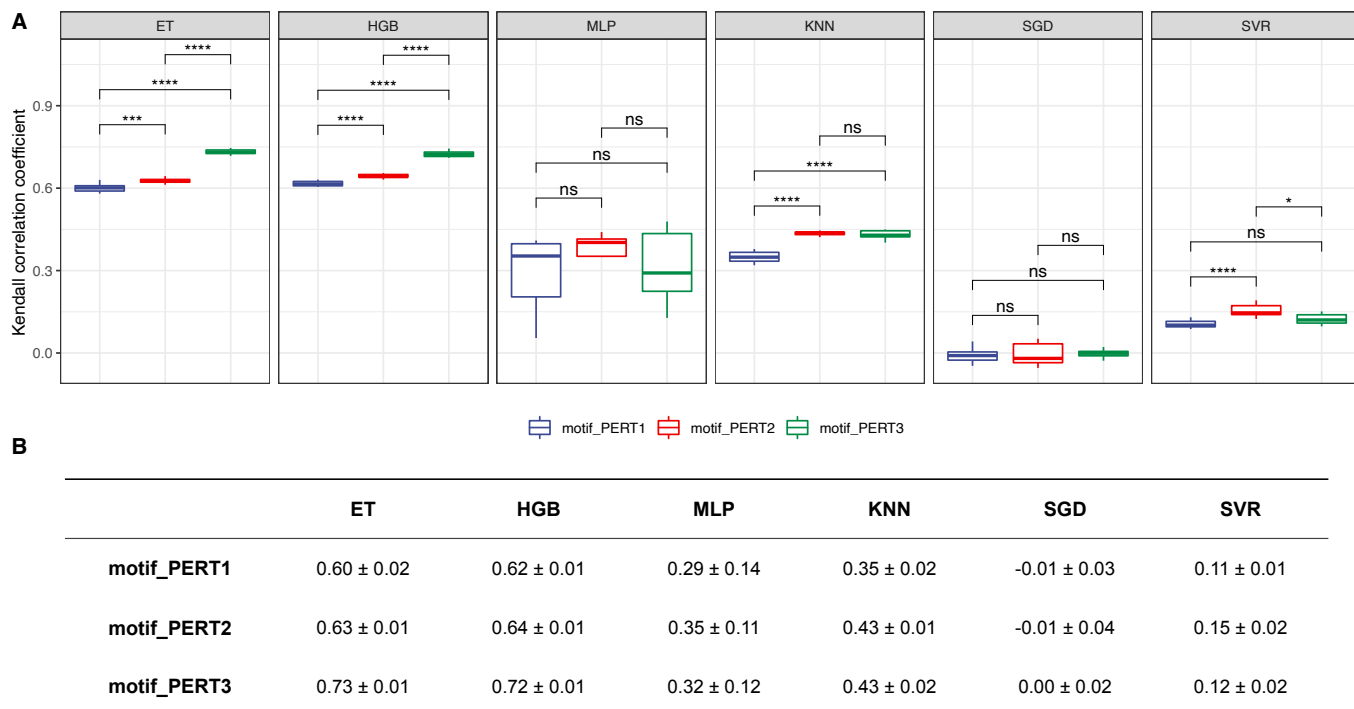

**Figure Supplementary Figure 3.** Performance of regression models. (A) The Kendall correlation coefficients of different regression models. Asterisks/ns indicate levels of statistical significance, calculated by pairwise Wilcoxon rank sum tests (P-value < 0.05 \*, < 0.01 \*\*, < 0.001 \*\*\*, < 0.0001 \*\*\*\*; ns, non significant). (B) A summary of the mean ± standard deviation values for Kendall correlation coefficients of regression models.
